# Supplementary material
Source: Preprints.org preprint supplement (doi:10.20944/preprints201907.0073.v1)
Supplement: Supplementary file 1 [file supplementary]

TS1. Records downloaded from GenBank and using in ML tree

| Species | GenBank ID | Autor |
| --- | --- | --- |
| *Daptonema sp.1*  *Monoposthia costata*  *Theristus sp*.  *Halomonhystera disjuncta*  *Enoplus sp.1*  *Daptonema sp.3*  *Panagrolaimus paetzoldi*  *Trefusia sp.1*  *Plectus aquatilis*  *Neochromadora poecilosomoides*  *Daptonema sp.2*  *Dichromadora geophila*  *Oncholaimellus sp.1*  *Trichotheristus mirabilis*  *Diplolaimella dievengatensis*  *Diplolaimelloides oschei*  *Nematoda sp.*  *Monhystrella parvella (2)* | HM627513  HM627512  HM627511  HM627510  HM627509  HM627508  HM627507  HM627506  HM627505  HM627504  HM627503  HM627502  HM627501  HM627500  HM627499  HM627498  KP254593  KJ608268, KJ608267 | Derycke *et al.,* 2010 |
| *Halomonhystera cf. continentalis* (9) | KJ124483 KJ124482 KJ124481 KJ124480 KJ124479 KJ124477 KJ124476 KJ124475 KJ124474 | Velasco-Castrillón and Stevens 2014 |
| *Halomonhystera cf. Halophila* (4) | KJ124473 KJ124472 KJ124471 KJ124470 |
| *Terschellingia longicaudata* (3) | LT795770 LT795771 LT795769 | Unpublished |
